# Supplementary material for: Anisotropic growth and structure-dependent photoresponse activity of multi-level one-dimensional PbS nano-architectures
Source: Royal Society of Chemistry journal article supplement (doi:10.1039/c6ra09712j), 2016-01-01
Supplement: c6ra09712j1.pdf [file c6ra09712j1.pdf]

# Anisotropic Growth and Structure-dependent Photoresponse Activity of Multi-level One- dimensional PbS Nano- architectures

Chenyang Zha,<sup>a, †</sup> Chao Pang,<sup>a, b†</sup> You Xu,<sup>a</sup> Cheng Ji,<sup>a, c</sup> Xiaoyan Zhang,<sup>a</sup> Liming Shen,<sup>a,\*</sup>  
Yifeng Wang,<sup>a</sup> Arunava Gupta,<sup>b</sup> and Ningzhong Bao<sup>a, c\*</sup>

<sup>a</sup> State Key Laboratory of Materials-Oriented Chemical Engineering, College of Chemistry and Chemical Engineering, Nanjing Tech University, Nanjing, Jiangsu 210009, P. R. China.

<sup>b</sup> Centre for Materials for Information Technology, The University of Alabama, Tuscaloosa, AL 35487, United States.

<sup>c</sup> Jiangnan Graphene Research Institute, Changzhou, Jiangsu 213159, P. R. China.

† These authors contributed equally to this work

\* Corresponding author:

Tel. & Fax: (+86)25-83172244

E-mail: lshen@njtech.edu.cn; (L. Shen); nzhbao@njtech.edu.cn (N. Bao)

## Content

Figure S1----- S2

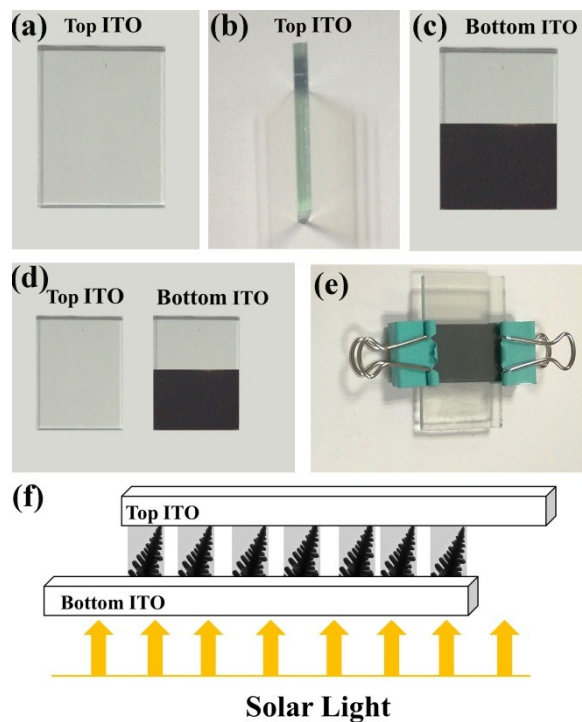

Figure S1. (a) Top-view and (b) side-view optical image of ITO glass; (c) PbS drop-casted on ITO glass; (d) Top-view comparison optical image of ITO glass and PbS/ITO glass; (e) a photoresponse device with ITO/PbS/ITO structure; (f) schematic illustration of the photoresponse device.
